# Supplementary material for: Enhancement of the Soluble Form of OX40 and OX40L Costimulatory Molecules but Reduction of the Membrane Form in Type 1 Diabetes (T1D)
Source: Hindawi journal article supplement (doi:10.1155/2019/1780567), 2019-08-01
Supplement: f1 [file 1780567.f1.pdf]

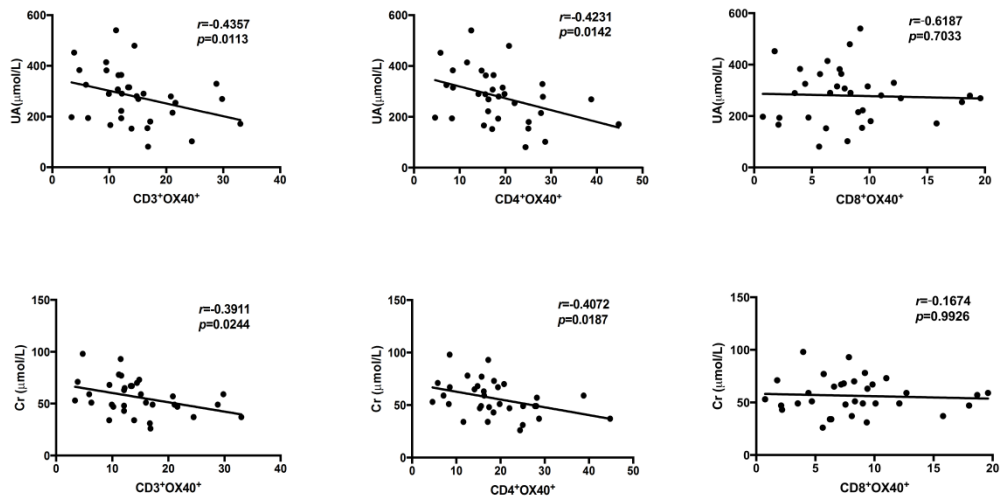

Supplement Figure.1

Supplement Figure.1 Correlations between CD3<sup>+</sup>OX40<sup>+</sup>, CD4<sup>+</sup>OX40<sup>+</sup>, CD8<sup>+</sup>OX40<sup>+</sup> and clinic pathological characteristics. Negative correlation between CD3<sup>+</sup>OX40<sup>+</sup>, CD4<sup>+</sup>OX40<sup>+</sup> and the expression of UA and Cr. No correlation between CD8<sup>+</sup>OX40<sup>+</sup> and the expression of UA and Cr.
